# Supplementary material
Source: PubMed Central journal article supplement (PMC535067)

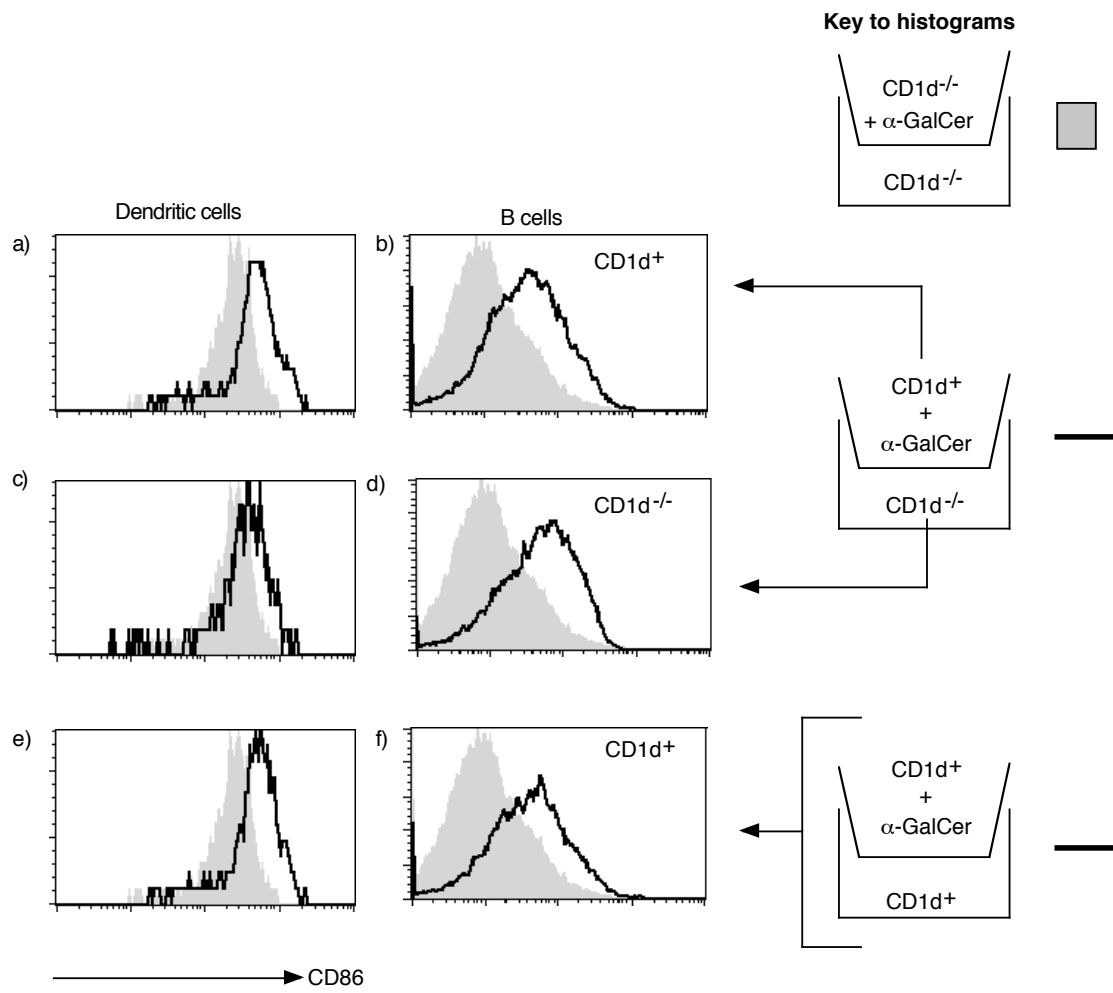

Supplement: JCI0422046sf1.pdf [file JCI0422046sf1.pdf]
